# Supplementary material for: Functionalized graphene quantum dots based non-enzymatic sensor for selective tyrosine detection
Source: Royal Society of Chemistry journal article supplement (doi:10.1039/d5ra08274a), 2026-01-01

## **Functionalized Graphene Quantum Dots Based Non-Enzymatic Sensor for Selective Tyrosine Detection**

**Priyadharshini Sriram <sup>a,b</sup>, Noel Nesakumar<sup>c</sup>, & John Bosco Balaguru Rayappan<sup>a,b\*</sup>**

*<sup>a</sup>Centre for Nanotechnology & Advanced Biomaterials (CeNTAB), SASTRA Deemed University,  
Thanjavur - 613 401, India*

*<sup>b</sup>School of Electrical & Electronics Engineering (SEEE), SASTRA Deemed University, Thanjavur  
- 613 401, India*

*<sup>c</sup>School of Chemical & Biotechnology (SCBT), SASTRA Deemed University,  
Thanjavur - 613 401, India*

---

### **\* Corresponding Author**

John Bosco Balaguru Rayappan, Ph.D.

Centre for Nanotechnology & Advanced Biomaterials (CeNTAB) &

School of Electrical & Electronics Engineering

SASTRA Deemed University, Thanjavur - 613 401, Tamil Nadu, India

Phone: +91 4362 350009; Ext: 2255; Fax: +91 4362 264 120

Email: [rjbosco@ece.sastra.edu](mailto:rjbosco@ece.sastra.edu)

## S1. Raman Spectra of GQDs

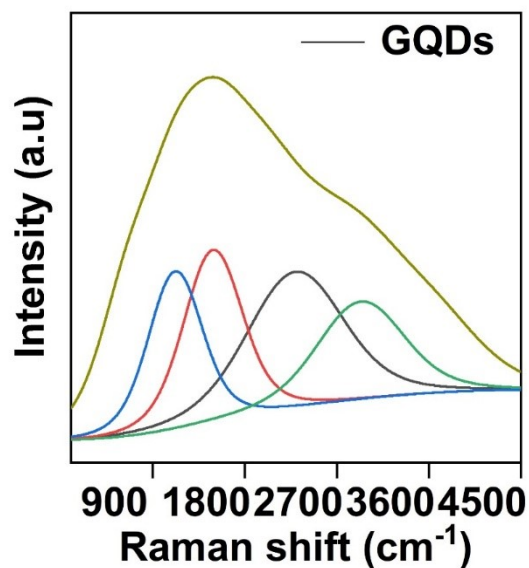

Fig S1. Raman spectra of GQDs

## S2. Reproducibility of the f-GQDs/SPCE

Thank you for the valuable comment. The sensor exhibited excellent reproducibility across 20 days with an RSD of 0.79%, encompassing both batch-to-batch fabrication consistency and long-term stability over 1–2 weeks.

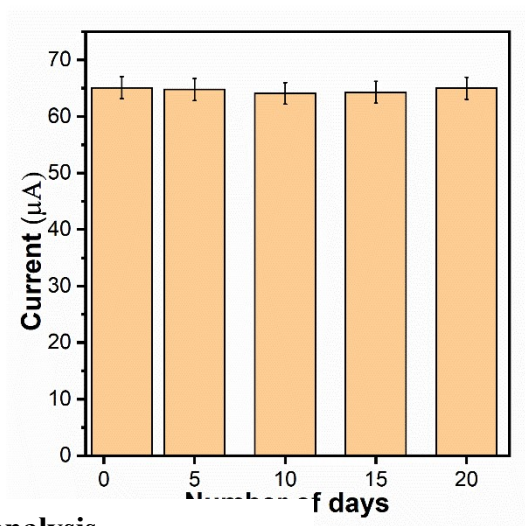

## S3. DLS and Zeta potential analysis

Fig. S2. Reproducibility of f-GQDs/SPCE

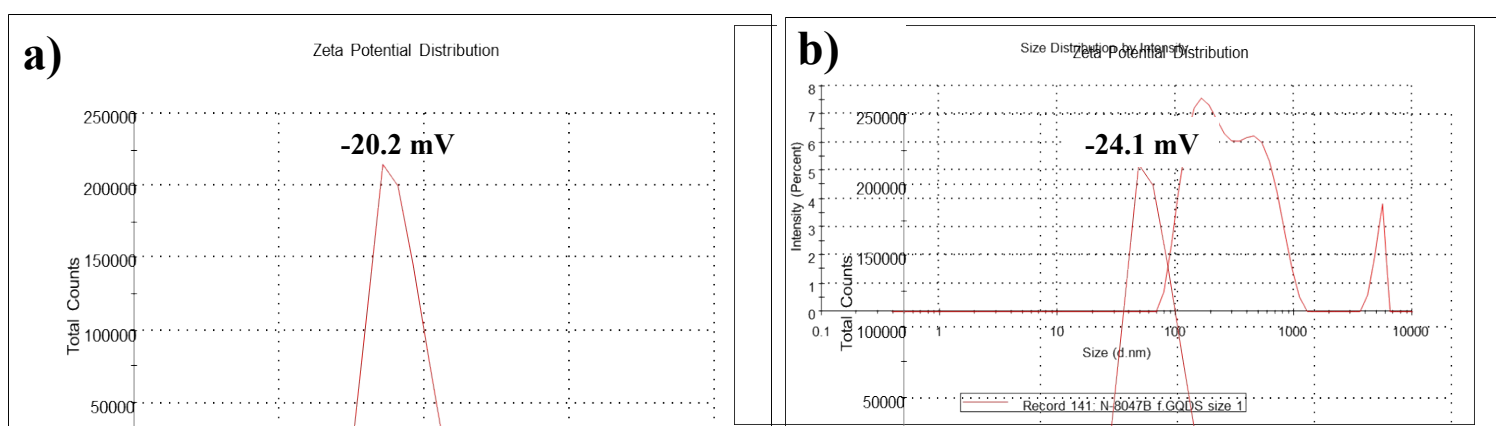

Supplement: d5ra08274a1.pdf [file d5ra08274a1.pdf]
